# Supplementary material for: Automatic Nonnutritive Suck Waveform Discrimination and Feature Extraction in Preterm Infants
Source: Comput Math Methods Med. 2019 Feb 4;2019:7496591. doi: 10.1155/2019/7496591 (PMC6378788; doi:10.1155/2019/7496591)
Supplement: Supplementary Materials — Three deidentified binary nonnutritive suck waveform files have been included as supplementary materials. They are from one subject with PMA of 34 weeks 5 days, 35 weeks, and 35 weeks 4 days, respectively. [file 7496591.f1.zip]

Archive with 3 entries (3 files):
- 7496591.f1/TMC09_DCPQD0QEG5W4_2017-01-11_09h39m42s.assess
- 7496591.f1/TMC09_DCPQD0QEG5W4_2017-01-13_09h18m36s.assess
- 7496591.f1/TMC09_DCPQD0QEG5W4_2017-01-17_11h36m33s.assess
